# Supplementary material
Source: PubMed Central journal article supplement (PMC3135809)
Supplement: mmc1.pdf [file mmc1.pdf]

The American Journal of Human Genetics, Volume 89

**Supplemental Data**

**Functional Mutation of *SMAC/DIABLO*,  
Encoding a Mitochondrial Proapoptotic Protein,  
Causes Human Progressive Hearing Loss DFNA64**

Jing Cheng, Yuhua Zhu, Sudan He, Yanping Lu, Jing Chen, Bing Han, Marco Petrillo, Kazimierz O. Wrzeszczynski, Shiming Yang, Pu Dai, Suoqiang Zhai, Dongyi Han, Michael Q. Zhang, Wei Li, Xuezhong Liu, Huawei Li, Zheng-Yi Chen, and Huijun Yuan

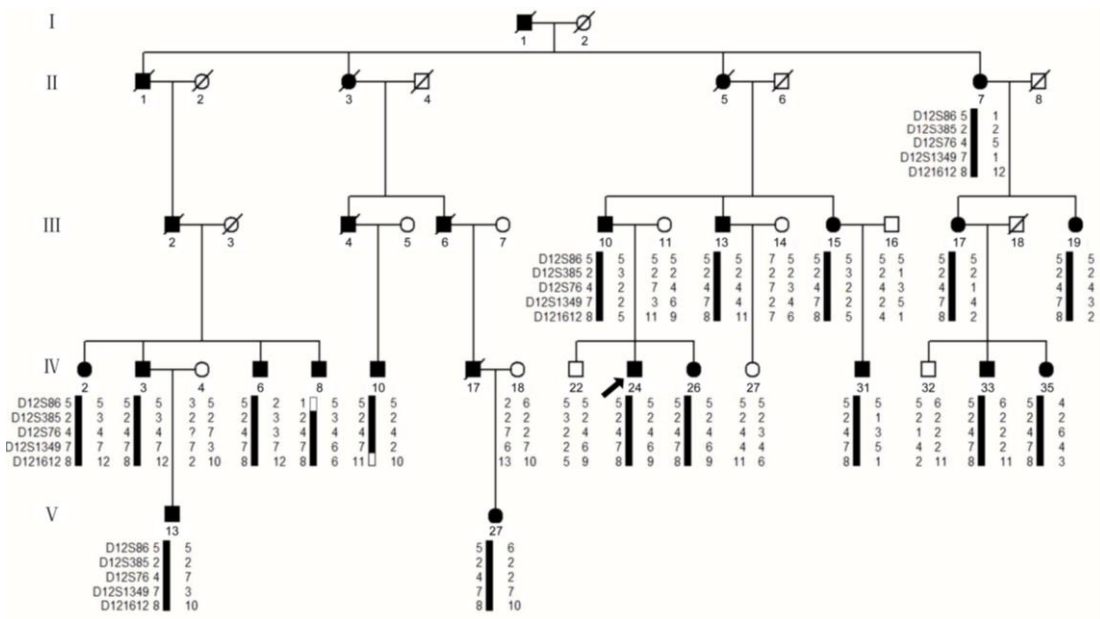

**Figure S1. Haplotype analysis of family HN-W078.** The segregating haplotype associated with hearing loss is indicated by a black bar, delimited by markers D12S86 and D12S1612 on chromosome 12.

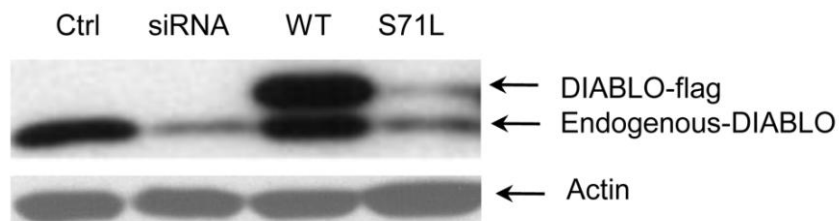

**Figure S2. Endogenous DIABLO was significantly reduced by siRNA transfection.**

**Table S1. Primers for sequencing of *DIABLO***

| Exon |   | Primer                        |
|------|---|-------------------------------|
| 1    | F | 5'- GTGGCGACACAGGCAGAG-3'     |
|      | R | 5'- CAGTAAGAACCCACACCAG-3'    |
| 2    | F | 5'- GGGCGTGGCTATGGGGCGAGGC-3' |
|      | R | 5'- GGGGCGGAGGCGGGGCTGTC-3'   |
| 3    | F | 5'- GCCCCTGCAAGTAAATCAA -3'   |
|      | R | 5'- GCCGGTACTGTGGGGGAAGG-3'   |
| 4    | F | 5'- CGTTTTTGTCTGCCTATTG -3'   |
|      | R | 5'- AGGCCTGGCTATGTTTCAAT -3'  |
| 5+6  | F | 5'- GAGGCAGCAGGATGGAAGAG -3'  |
|      | R | 5'- GAGCCACTTAGACCATTACT-3'   |
| 7    | F | 5'- CCCCAGGCCAACGTCCACATG-3'  |
|      | R | 5'- GCCAAAGTGTAGCAAATG-3'     |

**Table S2. Variants found in Candidate Genes in Family HN-W078**

| Gene          | Variant                     | Amino Acid    | Previously Reported | Control Chromosomes |
|---------------|-----------------------------|---------------|---------------------|---------------------|
| <i>DIABLO</i> | c.377 C>T (NM_019887.4)     | p. Ser126Leu  | No                  | 0/1000              |
| <i>DIABLO</i> | c.108 A>G (NM_019887.4)     | No change     | rs12870             |                     |
| <i>PSMD9</i>  | c.50 T>C (NM_002813.4)      | p. Val 17 Ala | rs2230681           |                     |
| <i>SBNO1</i>  | c.1698 T>C (NM_001167856.1) | No change     | rs61388686          |                     |
| <i>SBNO1</i>  | c.3099 G>A (NM_001167856.1) | No change     | rs61751327          |                     |
| <i>SBNO1</i>  | c.3466 C>A (NM_001167856.1) | No change     | rs3825141           |                     |
